# Supplementary material for: The Effect of Chlorine Modification of Precipitated Iron Catalysts on Their Fischer–Tropsch Synthesis Properties
Source: MDPI journal article supplement (doi:10.3390/catal12080812), 2022-07-24
Supplement: s1 [file s1]

## Supporting Information

Table S1 Mössbauer spectrum fitting results of precipitated iron catalysts with chlorine after reduction and Fischer-Tropsch synthesis reaction.

| Catalyst             | IS ( $\text{mm}\cdot\text{s}^{-1}$ ) | QS ( $\text{mm}\cdot\text{s}^{-1}$ ) | Hhf (T) | Content (%) | Phase                               |
|----------------------|--------------------------------------|--------------------------------------|---------|-------------|-------------------------------------|
| Cl0 after reduction  | 0.40                                 | 0.03                                 | 50.48   | 26.95       | $\text{Fe}_3\text{O}_4(\text{A})$   |
|                      | 0.54                                 | -0.13                                | 46.83   | 35.89       | $\text{Fe}_3\text{O}_4(\text{B})$   |
|                      | 0.40                                 | 0.07                                 | 25.42   | 7.42        | $\text{Fe}_5\text{C}_2(\text{I})$   |
|                      | 0.29                                 | 0.09                                 | 22.0    | 17.69       | $\text{Fe}_5\text{C}_2(\text{II})$  |
|                      | 0.37                                 | 0.15                                 | 12.77   | 6.63        | $\text{Fe}_5\text{C}_2(\text{III})$ |
|                      | 0.32                                 | 0.11                                 | 26.0    | 4.05        | $\text{Fe}_3\text{C}(\text{I})$     |
|                      | 0.40                                 | 0.13                                 | 24.3    | 1.36        | $\text{Fe}_3\text{C}(\text{II})$    |
| Cl01 after reduction | 0.40                                 | 0.05                                 | 50.70   | 46.55       | $\text{Fe}_3\text{O}_4(\text{A})$   |
|                      | 0.54                                 | -0.13                                | 46.90   | 43.18       | $\text{Fe}_3\text{O}_4(\text{B})$   |
|                      | 0.25                                 | -0.10                                | 26.00   | 3.10        | $\text{Fe}_5\text{C}_2(\text{I})$   |
|                      | 0.33                                 | -0.08                                | 23.00   | 3.27        | $\text{Fe}_5\text{C}_2(\text{II})$  |
|                      | 0.40                                 | 0.30                                 | 11.50   | 3.91        | $\text{Fe}_5\text{C}_2(\text{III})$ |
|                      | 0.34                                 | 0.25                                 | 24.61   | 0           | $\text{Fe}_3\text{C}(\text{I})$     |
|                      | 0.39                                 | -0.30                                | 24.30   | 0           | $\text{Fe}_3\text{C}(\text{II})$    |
| Cl01 after FT        | 0.40                                 | 0.05                                 | 50.68   | 27.97       | $\text{Fe}_3\text{O}_4(\text{A})$   |
|                      | 0.58                                 | -0.19                                | 46.90   | 26.13       | $\text{Fe}_3\text{O}_4(\text{B})$   |
|                      | 0.40                                 | 0.08                                 | 25.36   | 9.11        | $\text{Fe}_5\text{C}_2(\text{I})$   |
|                      | 0.33                                 | -0.04                                | 22.00   | 22.04       | $\text{Fe}_5\text{C}_2(\text{II})$  |
|                      | 0.28                                 | -0.02                                | 12.39   | 9.81        | $\text{Fe}_5\text{C}_2(\text{III})$ |
|                      | 0.29                                 | 0.19                                 | 26.00   | 3.93        | $\text{Fe}_3\text{C}(\text{I})$     |
|                      | 0.21                                 | -0.30                                | 25.00   | 1.01        | $\text{Fe}_3\text{C}(\text{II})$    |
| Cl1 after FT         | 0.40                                 | 0.03                                 | 50.91   | 36.04       | $\text{Fe}_3\text{O}_4(\text{A})$   |
|                      | 0.63                                 | -0.20                                | 46.90   | 34.81       | $\text{Fe}_3\text{O}_4(\text{B})$   |
|                      | 0.34                                 | 0.19                                 | 25.47   | 5.92        | $\text{Fe}_5\text{C}_2(\text{I})$   |
|                      | 0.37                                 | -0.05                                | 22.00   | 13.00       | $\text{Fe}_5\text{C}_2(\text{II})$  |
|                      | 0.30                                 | 0.08                                 | 11.50   | 6.41        | $\text{Fe}_5\text{C}_2(\text{III})$ |
|                      | 0.40                                 | -0.21                                | 26.00   | 3.17        | $\text{Fe}_3\text{C}(\text{I})$     |
|                      | 0.20                                 | -0.30                                | 24.30   | 0.65        | $\text{Fe}_3\text{C}(\text{II})$    |

Table S2 Binding energy of Cl0 and Cl1 before and after Fischer-Tropsch synthesis

| Catalyst     | Core-level           | Binding Energy (eV) |
|--------------|----------------------|---------------------|
| Cl0          | Fe 2p <sub>3/2</sub> | 711.55              |
|              | Fe 2p <sub>1/2</sub> | 724.45              |
| Cl1          | Fe 2p <sub>3/2</sub> | 711.50              |
|              | Fe 2p <sub>1/2</sub> | 724.60              |
|              | Cl 2p <sub>3/2</sub> | 198.55              |
|              | Cl 2p <sub>1/2</sub> | 200.18              |
| Cl0 after FT | Fe 2p <sub>3/2</sub> | 710.51              |
|              | Fe 2p <sub>1/2</sub> | 723.40              |
| Cl1 after FT | Fe 2p <sub>3/2</sub> | 710.82              |
|              | Fe 2p <sub>1/2</sub> | 724.55              |
|              | Cl 2p <sub>3/2</sub> | 198.19              |
|              | Cl 2p <sub>1/2</sub> | 199.85              |

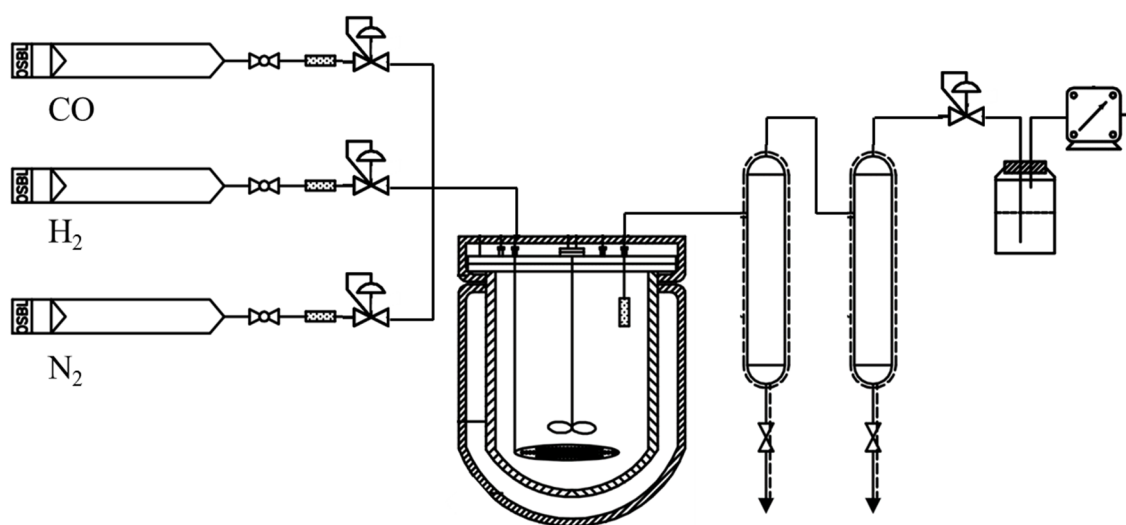

Figure S1 Flow diagram of the 1 L stirred tank reactor.

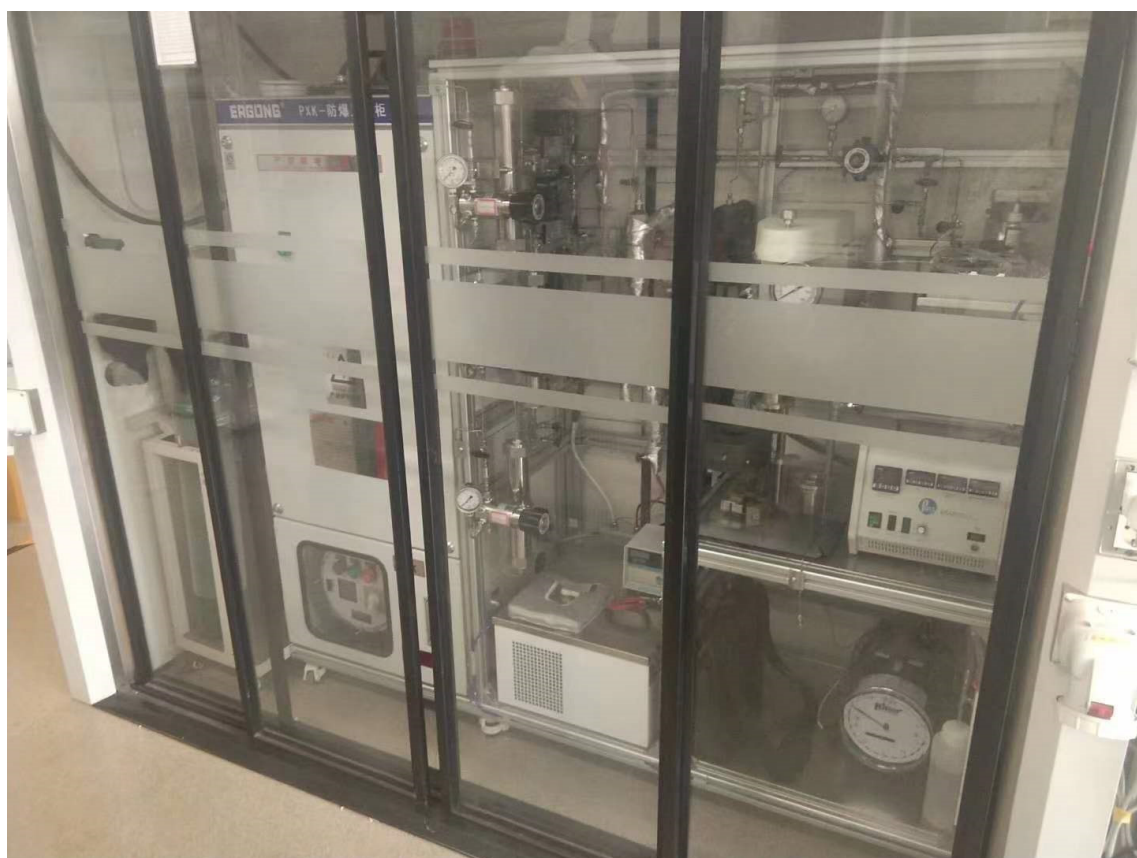

Figure S2 Picture of the 1 L stirred tank reactor.
